# Supplementary material for: Specialization on Ficus Supported by Genetic Divergence and Morphometrics in Sympatric Host-Populations of the Camellia Aphid, Aphis aurantii
Source: Frontiers journal article supplement (doi:10.3389/fevo.2021.786450), 2021-11-18
Supplement: Table_1.XLSX [file Table_1.XLSX]

## Sheet: Table S1
	Aphid species	Voucher number	Host plant family	Host plant species	Accession number
					COI	cytb	EF-1α	gnd	16S
	Aphis (Toxoptera) aurantii	HL_20150530_3	Magnoliaceae	Michelia alba	OK285285	OK305961	OK315508	OK315520	OK310572
		HL_20160406_4	Rutaceae	Murraya exotica	OK285286	OK305962	OK315480	OK315521	OK310573
		HL_20160408_12	Flacourtiaceae	Xylosma racemosum	OK285287	OK305963	OK315475	OK315522	OK310574
		HL_20160408_13	Rutaceae	Citrus maxima	OK285288	OK305964	OK315494	OK315523	OK310575
		HL_20160408_14	Rutaceae	Citrus maxima	OK285289	OK305965	OK315484	OK315524	OK310576
		HL_20160412_3	Moraceae	Ficus microcarpa	OK285290	OK305966	OK315474	OK315525	OK310577
		HL_20160413_4	Rutaceae	Citrus maxima	OK285291	OK305967	OK315496	OK315526	OK310578
		HL_20160413_5	Rutaceae	Citrus maxima	OK285292	OK305968	OK315497	OK315527	OK310579
		HL_20160414_5	Moraceae	Ficus virens	OK285293	–	OK315488	OK315528	OK310580
		HL_20160416_1	Theaceae	Camellia japonica	OK285294	OK305970	OK315492	OK315529	OK310581
		HL_20160419_1	Magnoliaceae	Michelia alba	OK285295	OK305971	OK315481	OK315530	OK310582
		HL_20160419_15	Rutaceae	Citrus maxima	OK285296	OK305972	OK315483	OK315531	OK310583
		HL_20160419_17	Rutaceae	Citrus maxima	OK285297	OK305973	OK315472	OK315532	–
		HL_20160419_2	Magnoliaceae	Michelia alba	OK285298	OK305974	OK315486	OK315533	OK310584
		HL_20160419_20	Rutaceae	Citrus reticulata	OK285299	OK305975	OK315490	OK315534	OK310585
		HL_20160419_21	Rutaceae	Citrus reticulata	OK285300	–	OK315473	–	OK310586
		HL_20160419_3	Theaceae	Camellia sinensis	OK285301	OK305976	OK315479	OK315535	OK310587
		HL_20160421_15	Flacourtiaceae	Xylosma racemosum	OK285302	OK305977	OK315493	OK315536	OK310588
		HL_20160421_18	Theaceae	Camellia sinensis	OK285303	OK305978	–	OK315537	OK310589
		HL_20160421_3	Theaceae	Camellia japonica	OK285304	OK305979	OK315482	OK315538	OK310590
		HL_20160421_4	Theaceae	Camellia japonica	OK285305	OK305980	OK315477	OK315539	OK310591
		HL_20160425_1	Anacardiaceae	Mangifera indica	OK285306	OK305981	–	OK315540	OK310592
		HL_20160428_10	Theaceae	Camellia japonica	OK285307	OK305982	OK315478	OK315541	OK310593
		HL_20160428_3	Theaceae	Camellia oleifera	OK285308	OK305983	OK315476	OK315542	OK310594
		HL_20160428_4	Theaceae	Camellia oleifera	OK285309	OK305984	OK315491	OK315543	OK310595
		HL_20160428_7	Theaceae	Camellia sinensis	OK285310	OK305985	OK315485	OK315544	OK310596
		HL_20160504_3	Magnoliaceae	Michelia alba	OK285311	OK305986	OK315503	OK315545	OK310597
		HL_20160505_2	Theaceae	Camellia sinensis	OK285312	OK305987	OK315495	OK315546	OK310598
		HL_20160518_6	Theaceae	Camellia sinensis	OK285313	OK305988	OK315489	OK315547	OK310599
		HL_20160520_1	Araliaceae	Schefflera octophylla	OK285314	OK305989	OK315498	OK315548	OK310600
		HL_20160520_7	Rubiaceae	Morinda parvifolia	OK285315	OK305990	OK315487	OK315549	–
		HL_20160630_2	Rubiaceae	Morinda umbellata	OK285316	OK305991	OK315505	OK315550	OK310601
		HL_20160728_8	Theaceae	Camellia japonica	OK285317	OK305992	OK315499	OK315551	OK310602
		HL_20160729_6	Theaceae	Camellia sinensis	OK285318	OK305993	OK315511	OK315552	OK310603
		HL_20160729_9	Theaceae	Camellia sinensis	OK285319	OK305994	OK315504	OK315553	OK310604
		HL_20161102_4	Theaceae	Camellia japonica	OK285320	OK305995	OK315506	OK315554	OK310605
		HL_20161112_1	Moraceae	Ficus pumila	OK285321	OK305996	OK315512	OK315555	OK310606
		HL_20161207_7	Araliaceae	Schefflera octophylla	OK285322	OK305997	OK315513	OK315556	OK310607
		HL_20161207_9	Theaceae	Camellia japonica	OK285323	OK305998	OK315514	OK315557	OK310608
		HL_20161215_1	Leguminosae	Calliandra haematocephala	OK285324	OK305999	–	OK315558	OK310609
		HL_20161218_2	Araliaceae	Fatsia japonica	OK285325	OK306000	OK315507	OK315559	OK310610
		HL_20170226_1	Leguminosae	Calliandra haematocephala	OK285326	OK306001	OK315515	OK315560	OK310611
		HL_20170305_1	Moraceae	Ficus pumila	OK285327	OK306002	OK315500	OK315561	OK310612
		HL_20170402_2	Pittosporaceae	Pittosporum tobira	MH820971	OK306003	OK315510	OK315562	OK310613
		HL_20170403_3	Moraceae	Ficus microcarpa	OK285328	OK306004	OK315501	–	OK310614
		HL_20170414_2	Moraceae	Ficus microcarpa	OK285329	–	OK315502	–	OK310615
		HL_20170414_30	Moraceae	Ficus microcarpa	OK285330	OK306005	OK315509	OK315563	OK310616
		HL_20170415_3	Hamamelidaceae	Loropetalum chinense	MH821075	OK306006	–	OK315564	OK310617
	Aphis gossypii_1	HL_20170205_3			MH821079	OK306007	OK315518	OK315565	KC897373
	Aphis gossypii_2	HL_20170326_8			MH821092	OK306008	OK315519	OK315566	KC897372
	Aphis spiraecola_1	HL_20170402_16			MH821374	OK306009	OK315516	OK315567	KC897427
	Aphis spiraecola_2	HL_20170408_3			MH821378	OK306010	OK315517	OK315568	KT175934

## Sheet: Table S2
		Character	Calliandra (n=15)		Camellia (n=30)		Citrus (n=28)		Ficus (n=30)		Loropetalum (n=20)		Michelia (n=20)		Morinda (n=10)		Xylosma (n=10)
			mean (mm)	range (mm)	mean (mm)	range (mm)	mean (mm)	range (mm)	mean (mm)	range (mm)	mean (mm)	range (mm)	mean (mm)	range (mm)	mean (mm)	range (mm)	mean (mm)	range (mm)
	Length (mm) of	BL	1.75445	1.602-2.012	1.54862	1.168-2.053	1.7288	1.490-1.970	1.66639	1.134-1.946	1.34791	0.929-1.660	1.577	1.553-1.601	1.2254	1.113-1.351	1.594	1.252-1.923
		BW	1.04292	0.846-1.177	0.936194	0.687-1.144	0.9969	0.892-1.129	0.941988	0.094-1.271	0.751576	0.092-1.074	1.034	1.028-1.040	0.6899	0.071-0.839	0.9407	0.804-1.077
		Ant1	0.096278	0.070-0.108	0.101595	0.080-0.121	0.1037	0.091-0.124	0.0918013	0.075-0.111	0.132528	0.073-0.890	0.0985	0.096-0.101	0.0903	0.080-0.100	0.0986	0.073-0.116
		Ant2	0.0791087	0.063-0.089	0.102062	0.063-0.830	0.0774	0.067-0.089	0.069427	0.056-0.092	0.0599258	0.047-0.067	0.067	0.062-0.072	0.0634	0.052-0.075	0.0661	0.050-0.081
		Ant3	0.378863	0.254-0.438	0.319826	0.202-0.433	0.33365	0.041-0.456	0.361096	0.237-0.440	0.307981	0.194-0.366	0.3485	0.335-0.362	0.33358	0.298-0.376	0.3789	0.338-0.410
		Ant3_HL	0.023395	0.013-0.033	0.0254946	0.016-0.033	0.0216	0.019-0.027	0.0367383	0.028-0.051	0.0201611	0.011-0.031	0.0255	0.025-0.026	0.0131	0.010-0.016	0.0204	0.013-0.028
		Ant3_W	0.0352014	0.028-0.040	0.0353496	0.028-0.041	0.0334	0.030-0.036	0.034852	0.027-0.042	0.0289984	0.024-0.035	0.0325	0.032-0.033	0.0283	0.026-0.030	0.0321	0.029-0.035
		Ant4	0.315309	0.190-0.374	0.266226	0.192-0.356	0.2834	0.189-0.337	0.246234	0.145-0.307	0.272569	0.186-0.790	0.274	0.257-0.291	0.2401	0.223-0.253	0.2889	0.238-0.325
		Ant5	0.315395	0.247-0.358	0.269785	0.225-0.328	0.2812	0.206-0.336	0.219437	0.142-0.299	0.239375	0.193-0.293	0.269	0.264-0.274	0.231778	0.209-0.247	0.2784	0.198-0.309
		Ant6_BL	0.110055	0.088-0.127	0.0997404	0.076-0.118	0.1061	0.089-0.121	0.0961279	0.071-0.173	0.0933557	0.084-0.105	0.0975	0.092-0.103	0.0902222	0.081-0.116	0.1002	0.082-0.110
		Ant6_PT	0.398366	0.317-0.444	0.412784	0.208-0.501	0.4479	0.399-0.483	0.356773	0.253-0.445	0.401615	0.348-0.475	0.3845	0.369-0.400	0.395333	0.303-0.432	0.443667	0.330-0.477
		WA	1.7475	1.410-1.882	1.55629	1.201-1.884	1.63335	1.320-1.891	1.43668	1.060-1.668	1.41637	1.136-1.661	1.539	1.511-1.567	1.43831	1.365-1.512	1.64511	1.313-1.762
		HF	0.546757	0.309-0.639	0.498331	0.317-0.619	0.5478	0.392-0.665	0.514041	0.339-0.650	0.454382	0.374-0.564	0.5085	0.472-0.545	0.4322	0.387-0.454	0.5736	0.489-0.633
		SIPH	0.213839	0.125-0.281	0.257509	0.167-0.351	0.2622	0.196-0.322	0.267477	0.184-0.320	0.254184	0.194-0.292	0.252	0.233-0.271	0.2236	0.188-0.255	0.2733	0.213-0.306
		SIPH_BW	0.089716	0.072-0.111	0.0962833	0.073-0.165	0.1026	0.059-0.119	0.0863597	0.062-0.128	0.0846663	0.060-0.117	0.1025	0.102-0.103	0.0796	0.062-0.095	0.1095	0.082-0.135
		SIPH_DW	0.0538073	0.049-0.059	0.0553537	0.046-0.064	0.0564	0.048-0.062	0.0525647	0.043-0.071	0.0451274	0.037-0.058	0.052	0.052-0.052	0.0466	0.043-0.052	0.0543	0.049-0.057
		Cauda	0.156461	0.096-0.192	0.186583	0.115-0.265	0.199	0.093-0.392	0.14588	0.109-0.189	0.157978	0.106-0.183	0.167	0.165-0.169	0.1764	0.158-0.192	0.2018	0.184-0.230
		Cauda_BW	0.113319	0.077-0.140	0.122847	0.093-0.216	0.2192	0.109-0.800	0.098263	0.011-0.127	0.092955	0.066-0.159	0.097	0.092-0.102	0.0903	0.079-0.111	0.1152	0.099-0.132
		T1_DHL	0.0297253	0.018-0.046	0.0410507	0.023-0.062	0.0338	0.021-0.058	0.058204	0.032-0.084	0.0231037	0.015-0.035	0.0231037	0.015-0.035	0.015	0.011-0.018	0.0221	0.017-0.032
		T8_HL	0.059628	0.041-0.073	0.0592752	0.031-0.080	0.0688	0.052-0.096	0.0649562	0.027-0.086	0.0588458	0.038-0.071	0.063	0.053-0.073	0.0524	0.034-0.062	0.0628	0.049-0.079
	Ratio	WA/BL	0.968823	0.838-1.108	1.00382	0.799-1.218	0.945022	0.730-1.061	0.863102	0.690-1.149	1.05654	0.917-1.226	0.975859	0.973-0.979	1.18505	1.058-1.311	1.04556	0.879-1.206
		Ant1/WA	0.0564001	0.048-0.070	0.066271	0.054-0.088	0.0646798	0.054-0.090	0.0640606	0.053-0.074	0.0638129	0.049-0.076	0.0640534	0.061-0.067	0.0620311	0.055-4.067	0.0587194	0.051-0.064
		Ant2/WA	0.0460334	0.037-0.059	0.0497167	0.040-0.064	0.0479491	0.037-0.056	0.0486092	0.037-0.061	0.0427171	0.034-0.056	0.0434901	0.041-0.046	0.0432562	0.036-2.448	0.0396808	0.033-0.046
		Ant3/WA	0.224531	0.180-0.237	0.205479	0.155-0.261	0.199124	0.028-0.252	0.249533	0.212-0.275	0.217723	0.169-0.270	0.226361	0.222-0.231	0.229668	0.216-1.257	0.22939	0.209-0.260
		Ant3_HL/WA	0.0145804	0.011-0.019	0.0163089	0.013-0.022	0.0134194	0.011-0.018	0.025878	0.018-0.037	0.0140909	0.008-0.020	0.0165806	0.016-0.017	0.00889219	0.007-3.311	0.0122836	0.009-0.016
		Ant3_W/WA	0.0203138	0.017-0.027	0.0230305	0.017-0.034	0.0208312	0.017-0.027	0.0246722	0.021-0.037	0.02111	0.019-0.030	0.0211305	0.020-0.022	0.019632	0.018-8.222	0.0196403	0.018-0.024
		Ant4/WA	0.191218	0.174-0.199	0.172781	0.138-0.204	0.17311	0.137-0.226	0.17129	0.137-0.210	0.170927	0.150-0.201	0.177896	0.170-0.186	0.166378	0.154-4.176	0.173315	0.164-0.182
		Ant5/WA	0.183077	0.173-0.190	0.174828	0.159-0.206	0.172007	0.149-0.221	0.152013	0.132-0.186	0.166238	0.157-0.173	0.174788	0.175-0.175	0.161138	0.151-9.174	0.168633	0.151-0.178
		Ant6_BL/WA	0.0648179	0.057-0.072	0.0653112	0.056-0.077	0.0654505	0.059-0.074	0.0654617	0.053-0.077	0.0654617	0.053-0.077	0.0633088	0.061-0.066	0.0629084	0.054-2.485	0.0609604	0.056-0.072
		Ant6_PT/WA	0.233923	0.223-0.267	0.265613	0.149-0.319	0.27768	0.242-0.336	0.249032	0.168-0.303	0.27185	0.175-0.303	0.250104	0.235-0.265	0.27462	0.218-5.299	0.269302	0.251-0.290
		Ant3_HL/BL	0.0133377	0.008-0.016	0.0167583	0.010-0.028	0.0125846	0.010-0.016	0.0221641	0.017-0.027	0.015012	0.008-0.023	0.0161785	0.016-0.017	0.0107238	0.008-1.714	0.0128759	0.010-0.020
		Ant3_HL/Ant3	0.0624964	0.042-0.086	0.0838828	0.055-0.144	0.10646	0.047-0.494	0.104219	0.069-0.144	0.0655623	0.036-0.103	0.0733364	0.069-0.078	0.0393599	0.031-9.351	0.0535337	0.038-0.074
		Ant3_HL/Ant3_W	0.671265	0.385-0.924	0.723922	0.409-1.000	0.647702	0.556-0.818	1.06954	0.725-1.548	0.690328	0.400-0.912	0.784564	0.781-0.788	0.462345	0.384-6.571	0.635922	0.406-0.903
		Ant3_W/T1_DHL	1.24018	0.765-1.740	0.921671	0.532-1.652	1.11065	0.603-1.714	0.627166	0.393-1.094	1.31191	0.914-1.933	1.09176	0.914-1.269	1.91982	1.556-2.545	1.51813	1.000-1.882
		Ant6_BL/Ant6_PT	0.277534	0.253-0.310	0.255249	0.204-0.479	0.236841	0.217-0.264	0.267018	0.201-0.387	0.23643	0.194-0.280	0.254566	0.230-0.279	0.231357	0.189-3.311	0.226947	0.199-0.269
		T1_DHL/BL	0.0169501	0.010-0.023	0.0266314	0.016-0.040	0.0193615	0.011-0.032	0.0352445	0.018-0.050	0.0171482	0.011-0.024	0.0193016	0.017-0.022	0.0122402	0.008-8.614	0.0139797	0.010-0.022
		SIPH/BL	0.121871	0.078-0.150	0.16689	0.120-0.222	0.150625	0.128-0.171	0.161649	0.125-0.223	0.192465	0.155-0.273	0.159651	0.150-0.169	0.183329	0.153-6.229	0.172895	0.147-0.199
		SIPH/Cauda	1.37739	1.126-1.765	1.39109	1.121-1.873	1.48177	0.500-2.860	1.86284	1.435-2.771	1.64861	1.317-2.642	1.50784	1.412-1.604	1.27189	1.093-1.476	1.35624	1.151-1.482

## Sheet: Table S3
	Gene	Host plant	No. of taxa	T (%)	C (%)	A (%)	G (%)	A+T (%)	Conserved sites	Variable sites	Parsimony-informative sites	Genetic distance (K2P)
												Range (%)	Mean (%)
	COI	Other plant genera (Group 1)	41	40.3	14	35.7	10	76	601	9	6	0-0.8	0.2
		Ficus (Group 2)	7	39.8	14.3	36.1	9.8	75.9	610	none	none	0-0	0
		Combine	48	40.2	14	35.8	10	76	595	15	15	0-1.8	0.5
	Cytb	Other plant genera (Group 1)	40	42.3	12.8	35.2	9.7	77.5	722	10	7	0-0.8	0.3
		Ficus (Group 2)	5	42.2	13.1	34.8	9.8	77	732	none	none	0-0	0
		Combine	45	42.3	12.8	35.2	9.7	77.5	655	77	77	0-2.8	0.7
	COI+Cytb	Other plant genera (Group 1)	40	41.1	13.3	35.4	9.9	76.5	1323	19	13	0-0.8	0.2
		Ficus (Group 2)	5	41.1	13.6	35.4	9.8	76.5	1342	none	none	0-0	0
		Combine	45	41.4	13.3	35.4	9.9	76.8	1305	37	37	0-2.3	0.6
	EF-1α (Exon)	Other plant genera (Group 1)	37	26.3	21.8	28.2	23.8	54.5	709	3	3	0-0.4	0.1
		Ficus (Group 2)	7	26.5	21.5	28.1	23.8	54.6	706	6	2	0-0.8	0.3
		Combine	44	26.3	21.7	28.2	23.8	54.5	703	9	5	0-0.8	0.2
	gnd	Other plant genera (Group 1)	40	36.2	11.1	39.1	13.6	75.3	816	5	4	0-0.5	0.1
		Ficus (Group 2)	5	35.8	11.3	39.3	13.7	75.1	815	6	none	0-0.7	0.3
		Combine	45	36.2	11.1	39.1	13.6	75.3	765	56	54	0-7.1	1.4
	16s	Other plant genera (Group 1)	39	21.7	19.3	29.4	29.6	51.1	334	3	none	0-0.9	0
		Ficus (Group 2)	7	22	19.1	29.2	29.8	51.2	333	1	none	0-1.2	0.3
		Combine	46	21.7	19.3	29.4	29.6	51.1	329	8	4	0-1.8	0.3
	gnd+16s	Other plant genera (Group 1)	38	32	13.5	36.3	18.2	68.3	1151	7	4	0-0.4	0.1
		Ficus (Group 2)	5	31.8	13.6	36.4	18.3	68.2	1148	10	10	0-0.9	0.3
		Combine	43	32	13.5	36.3	18.2	68.3	1095	63	58	0-5.4	1.1

## Sheet: Table S4
	Distances	Intraspecific		Interspecific
		Frequency	Percentage	Frequency	Percentage
	<= 0.0%	260663	59.75	62	0
	0.0% to 0.5%	140497	32.2	4083	0.07
	0.5% to 1.0%	24514	5.61	4212	0.07
	1.0% to 1.5%	2098	0.48	4181	0.07
	1.5% to 2.0%	4653	1.06	26433	0.49
	2.0% to 2.5%	3595	0.82	27068	0.5
	2.5% to 3.0%	203	0.04	34283	0.63
	3.0% to 3.5%	0	0	150449	2.8
	3.5% to 4.0%	0	0	67823	1.26
	4.0% to 4.5%	0	0	27686	0.51
	4.5% to 5.0%	0	0	100895	1.87
	5.0% to 5.5%	0	0	67632	1.25
	5.5% to 6.0%	0	0	745968	13.88
	6.0% to 6.5%	0	0	734359	13.66
	6.5% to 7.0%	0	0	1188765	22.12
	7.0% to 7.5%	0	0	976732	18.17
	7.5% to 8.0%	0	0	633942	11.79
	8.0% to 8.5%	0	0	214961	4
	8.5% to 9.0%	0	0	222017	4.13
	9.0% to 9.5%	0	0	84511	1.57
	9.5% to 10.0%	0	0	54253	1
	10.0% to 10.5%	0	0	2247	0.04
	10.5% to 11.0%	0	0	331	0
	>11.0%	0	0	10	0

## Sheet: Table S5
		Character part	One-way ANOVA	post hoc Multiple comparisons (LSD)
			P-value	Ficus VS Calliandra	Ficus VS Camellia	Ficus VS Citrus	Ficus VS Loropetalum	Ficus VS Michelia	Ficus VS Morinda	Ficus VS Xylosma
	Length (mm) of	BL	6.8711e-12	0.147	0.018	0.372	9.2895e-08	0.522	4.6042e-09	0.301
		BW	1.7236e-07	0.052	0.89	0.357	0.000113	0.44	4.3e-05	0.983
		Ant1	0.734	0.845	0.601	0.653	0.057	0.899	0.955	0.797
		Ant2	0.514	0.656	0.068	0.751	0.637	0.961	0.81	0.895
		Ant3	0.012	0.401	0.018	0.251	0.006	0.792	0.25	0.456
		Ant3_HL	5.9633e-29	9.3732e-15	1.5395e-15	7.1675e-15	1.7257e-22	0.001	1.4987e-26	1.5912e-16
		Ant3_W	2.9682e-12	0.725	0.538	0.197	2.0142e-09	0.296	4.6256e-08	0.015
		Ant4	0.069	0.002	0.252	0.122	0.18	0.562	0.798	0.077
		Ant5	1.4685e-12	2.0924e-13	3.6918e-07	2e-06	0.056	0.042	0.33	4e-06
		Ant6_BL	0.005	0.002	0.296	0.031	0.496	0.881	0.217	0.375
		Ant6_PT	0.000284	0.044	0.001	2.2e-05	0.021	0.492	0.072	8.8e-05
		WA	1.9e-05	8e-06	0.02	0.002	0.725	0.412	0.98	0.002
		HF	4e-06	0.132	0.375	0.177	0.003	0.911	0.001	0.018
		SIPH	0.000157	1.1e-05	0.298	0.696	0.222	0.567	0.001	0.667
		SIPH_BW	0.000357	0.534	0.026	0.01	0.735	0.197	0.279	0.000304
		SIPH_DW	1.1642e-11	0.397	0.021	0.025	2.3724e-07	0.867	0.001	0.306
		Cauda	1e-06	0.306	4e-06	1.8e-05	0.215	0.376	0.011	7e-06
		Cauda_BW	0.000151	0.464	0.144	1e-06	0.784	0.979	0.737	0.475
		T1_DHL	1.7758e-28	4.1114e-16	1.9643e-10	1.5912e-10	1.7432e-23	0.00012	3.8519e-23	2.6368e-18
		T8_HL	0.061	0.168	0.076	0.387	0.089	0.825	0.005	0.627
	Ratio	WA/BL	0.882959	0.01	1.6e-05	0.036	3.6011e-07	0.142	3.4871e-12	1.7e-05
		Ant1/WA	0.039346	0.00855305	0.315833	0.821824	0.921355	0.998927	0.478152	0.0641071
		Ant2/WA	0.000364	0.263523	0.530934	0.765101	0.00429099	0.241695	0.0215902	0.000185104
		Ant3/WA	2.6e-05	0.0247343	1.08249e-06	6.63906e-06	0.00135059	0.267581	0.0729264	0.0690666
		Ant3_HL/WA	4.1697e-26	2.6212e-14	3.21946e-16	4.64115e-17	7.69002e-18	0.000167482	1.4074e-23	3.96697e-18
		Ant3_W/WA	0.000223	0.00114811	0.103407	0.00277149	0.00238694	0.153717	0.00019541	0.000199886
		Ant4/WA	0.036406	0.000878265	0.738503	0.744637	0.943188	0.549168	0.398478	0.727406
		Ant5/WA	5.9241e-09	2.71417e-09	1.03689e-08	2.76653e-05	0.000873174	0.0123919	0.0555051	0.000648982
		Ant6_BL/WA	0.539786	0.79179	0.936028	0.996165	0.553341	0.641881	0.296515	0.0674267
		Ant6_PT/WA	0.02097	0.219954	0.0813341	0.0168938	0.0364154	0.963272	0.0392535	0.100962
		Ant3_HL/BL	1.0152e-22	1.2697e-15	1.8523e-10	8.3569e-15	2.311e-13	0.006	7.3725e-19	3.5422e-14
		Ant3_HL/Ant3	0.0002	0.003	0.072	0.886	0.002	0.323	6e-05	0.001
		Ant3_HL/Ant3_W	2.0245e-21	5.5361e-13	2.8795e-14	7.3271e-12	6.2082e-14	0.011	1.232e-19	2.4342e-12
		Ant3_W/T1_DHL	3.0467e-25	1.4436e-10	5.9e-05	3e-06	2.8932e-14	0.02	1.0261e-24	3.6347e-15
		Ant6_BL/Ant6_PT	0.087869	0.540202	0.385095	0.0810074	0.0596848	0.712838	0.0478077	0.0265802
		T1_DHL/BL	1.2688e-26	7.7375e-18	4.1552e-08	6.0015e-12	1.8655e-19	0.0002	5.4432e-20	5.3459e-18
		SIPH/BL	7.4385e-12	5.0999e-07	0.393	0.205	2e-05	0.908	0.013	0.196
		SIPH/Cauda	1.5967e-09	3.3778e-07	2.7532e-09	0.000356	0.013	0.089	8.9458e-08	3e-06
